# PanACoTA: A modular tool for massive microbial comparative genomics

Amandine PERRIN<sup>1,2,3</sup> and Eduardo ROCHA<sup>1</sup>

<sup>1</sup>Microbial Evolutionary Genomics, CNRS, UMR3525, Institut Pasteur, 28, rue Dr Roux, Paris, 75015, France

<sup>2</sup>Sorbonne Universite, College doctoral, F-75005 Paris, France

<sup>3</sup>Bioinformatics and Biostatistics Hub, Department of Computational Biology, Institut Pasteur, USR 3756 CNRS, Paris, France

## Abstract

*The gene repertoires of microbial species, their pangenomes, evolve very fast. Their study facilitates the discrimination between lineages and reveals which genes drive their recent adaptation. It has therefore become a key topic of study in microbial evolution and genomics. Yet, the increase in the number of genomes available to certain species, now reaching many thousands, complicates the establishment of the basic building blocks of comparative genomics. Here, we present PanACoTA, a tool that allows to download all genomes of a species, build a database with those passing quality and redundancy controls, define uniform annotation, and use them to build a pangenome, several variants of core or persistent genomes, their alignments, and a rapid but accurate phylogenetic tree. While many programs have become available in the last few years to build pangenomes, we have focused on a method that tackles all the key steps of the process, from download to phylogenetic inference. This was conceived in a modular way, i.e. while all steps are integrated, they can also be run separately and multiple times to allow rapid and extensive exploration of the space of parameters of interest. The software is built in Python 3 and includes features to facilitate its installation and its future development. We believe PanACoTa is an interesting addition to the current set of bioinformatics software for comparative genomics, since it will accelerate and standardize the more routine parts of the work, allowing microbial genomicists to more quickly tackle their specific questions.*

**Keywords**— Software, bacteria, annotation, core genomes, pangenomes, evolutionary analyses

## 1 Introduction

Low cost of sequencing and the availability of hundreds of thousands of genomes have made comparative genomics a basic toolkit of many microbiologists, geneticists, and evolutionary biologists. Many bacterial species of interest have now over 100 genomes publicly available in the GenBank RefSeq reference database, and a few have more than ten thousand. This

27 trend will increase with the ever decreasing costs of sequencing, the availability of long-read  
28 technologies, and the use of whole-genome sequencing in the clinic for diagnostics and epidemi-  
29 ology. As a result, researchers that would like to use available data are faced with extremely  
30 large amounts of data to analyze. Comparative genomics has spurred important contributions  
31 to the understanding of the organization and evolution of bacterial genomes in the last two  
32 decades [1] [2]. It has become a standard tool for epidemiological studies, where the analysis  
33 of the genes common to a set of strains - the core or persistent genome - provides unrivalled  
34 precision in tracing the expansion of clones of interest [3] [4]. The use of routine sequencing  
35 in the clinic will further require rapid and reliable analysis tools to query thousands, and soon  
36 possibly millions of genomes from a single species [5]. Population genetics also benefits from  
37 this wealth of data because one can now track in detail the origin and fate of mutations of  
38 genetic acquisitions to understand what they reveal of adaptive or mutational processes [6].  
39 Finally, genome-wide association studies have been recently adapted to bacterial genetics, to  
40 account for variants in single nucleotide polymorphism and gene repertoires [7]. They hold the  
41 promise of helping biologists to identify the genetic basis of phenotypes of interest. Given the  
42 high genetic linkage in bacterial genomes, these studies may require extremely large datasets  
43 to detect small effects. More specifically, reverse vaccinology is also a noteworthy application  
44 of these pangenomics methods, to identify novel potential antigens among core surface-exposed  
45 proteins of a given clade [8].

46 The availability of large genomic datasets puts a heavy burden on researchers, especially  
47 those that lack extensive training in bioinformatics, because their analysis implicates the use of  
48 automatic processes, efficient tools, extensive standardization, and quality control. Many tools  
49 have been recently developed to make rapid searches for sequence similarity with excellent recall  
50 rates for highly similar sequences [9] [10] [11].

51 Other tools also provide methods to rapidly cluster large numbers of sequences in families  
52 of sequence similarity, to get the families common to a set of genomes, to align them, or  
53 to produce their phylogeny, four cornerstones of comparative genomics. A number of recent  
54 programs have recently been published that include some of these tools to compute bacterial  
55 pangenomes (for a review, see [12]). Many of these programs compute alignments and clusters  
56 of families using programs that are very fast. Some use tools that are known to sacrifice

57 accuracy for very high speed, such as DIAMOND [9], USEARCH [13] and CD-HIT [14]. The  
58 latter is used, among others by Roary [15], which is currently the most popular tool to compute  
59 pangenomes, and Panaroo [16], a very recent tool aiming at reducing the impact of erroneous  
60 automated annotation of prokaryotic genomes. BPGA [17], using USEARCH or CD-HIT to  
61 cluster proteins, also provides some downstream analyses. PanX [18], which has an outstanding  
62 graphical interface, uses DIAMOND to search for similarities among genes.

63 More recently, SonicParanoid introduced the use of the highly efficient and accurate pro-  
64 gram mmseqs2 to build pangenomes, and PPanGGOLiN used the same tool to provide a  
65 method to statistically class pangenome families in terms of their frequency [19] [20] [21] .  
66 Some recent programs also use graph-based approaches to further refine the pangenomes, such  
67 as PPanGGOLiN and Panaroo [16]. For that matter, the analysis of a dataset of 319 *Kleb-*  
68 *siella pneumoniae* genomes by both tools provide very similar results [16]. Some tools, such  
69 as PIRATE [22] have also been recently developed to cluster orthologues between distant  
70 genomes. However, all these programs lack some or all of initial and final steps that are essen-  
71 tial in comparative genomics, including download, quality control, alignment and phylogenetic  
72 inference. This spurred the development of PanACoTA (PANgenome with Annotations, COre  
73 identification, Tree and corresponding Alignments). To take advantage of the vast amount of  
74 genomic information publicly available, one needs six major blocks of operations. (1) Gather  
75 a set of genomes of a clade automatically. This requires some quality control, to avoid drafts  
76 with an excessive number of contigs. It is also often convenient to check that the genomes are  
77 not too redundant, to minimize computational cost and biases due to pseudo-replication. On  
78 the other side, it is important to check that genomes are neither too unrelated, to eliminate  
79 genomes that were misclassified in terms of bacterial species (or the taxonomic organisation of  
80 relevance). (2) Define *a priori* an uniform nomenclature and annotation, without which the  
81 calculation of pangenomes and core genomes becomes unreliable for large datasets. (3) Produce  
82 the pangenome, a matrix with the patterns of presence absence of each gene family in the set of  
83 genomes, using an accurate, simple, and fast method. (4) Use the pangenome to identify sets  
84 of core or persistent genes. (5) Produce multiple alignments of the gene families of the core  
85 or persistent genomes. (6) Finally, produce quickly a reasonably accurate phylogeny of the set  
86 of core/persistent genes. These four collections of data, pangenome, core genome, alignments,

87 and phylogenetic tree, are the basis of most microbial comparative genomics studies. At the  
88 end of this process, the researcher can produce more detailed analyses, specific to the questions  
89 of interest, which often lead to changes such as including/excluding taxa, changing the limits  
90 of sequence similarity, increasing alignment accuracy, or rebuilding phylogenies using different  
91 methods. Such re-definitions can be achieved more efficiently when pipelines are modular and  
92 allow to re-start the analyses at several key points in the process.

93       Considering the current availability of pipelines for microbial comparative genomics, we have  
94 built one that is modular, easy to setup, uses state-of-the-art tools, and allows simple re-use of  
95 intermediate results. The goal was to provide a pipeline that allows to download all genomes  
96 from a taxonomic group and make all basic comparative genomics work automatically. The  
97 pipeline is entirely built in a single language, Python v3, and uses modern methods to facilitate  
98 its future maintenance and to limit unwanted behaviour. PanACoTA is freely available under  
99 the open source GNU AGPL license. Here, we describe the method and illustrate it with an  
100 analysis of two datasets of 225 complete and 3980 complete or draft genomes of *Klebsiella*  
101 *pneumoniae*. This species is interesting for our purposes because there are many genomes  
102 available and it has a very open pangenome [23]. The first dataset describes a situation where  
103 sequence quality is usually high, and the second illustrates how the method scales-up to a very  
104 large dataset where sequence is of lower quality or genes are fragmented due to lack of complete  
105 assembly. The procedure is detailed in the Methods section, whereas the illustration of its use,  
106 and how it changes in relation to key options in the two datasets, is detailed in the Results  
107 section.

## 108 2 Methods

109 PanACoTa is implemented in 6 sequential modules, described in the six sections below. It was  
110 designed to allow the use of a module without requiring the use of previous one(s). This allows  
111 to start or stop at any step and re-run an analysis with other parameters (see Figure 1 ).

### 112 2.1 Datasets

113 The first module of PanACoTA - `prepare` - allows to fetch all genomes from a given NCBI taxon-  
114 omy ID. This uses scripts from `ncbi_genome_download` library (<https://github.com/kbclin/>

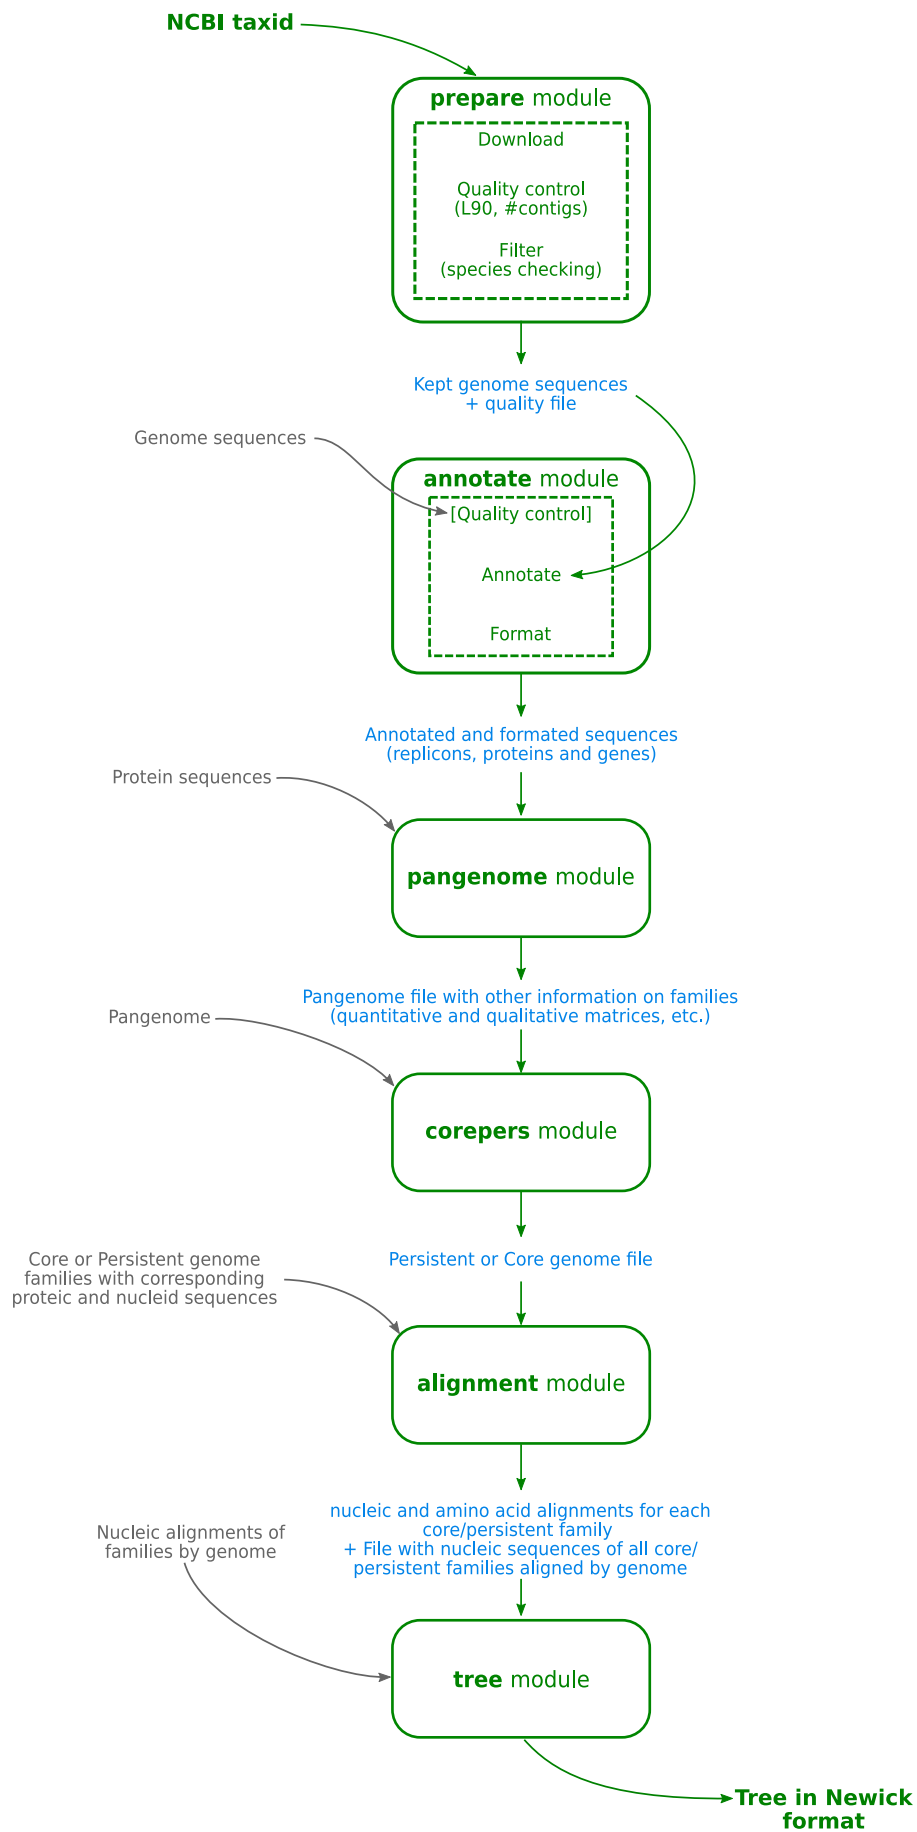

Figure 1: Overview of PanACoTA method

115 [ncbi-genome-download](#)). PanACoTA retrieves the corresponding compressed non-annotated  
116 fasta files of the genomes from the NCBI ftp.

117 In this paper, we use two datasets of *Klebsiella pneumoniae* genomes to illustrate how PanA-  
118 CoTA functions. The first one, called hereafter DTS1, contains all complete and draft genomes  
119 downloaded from the NCBI refseq database on October 2018 10<sup>th</sup>. The second dataset, DTS2,  
120 is the subset of DTS1 containing only the complete genomes (genomes with `assembly_level`  
121 = `Complete Genome`, based on the NCBI summary file). This initial database was then given  
122 to a quality control procedure, described in the next section. At the end, this module outputs  
123 a database with the genomes admissible after this control step: 3980 genomes for DTS1, with  
124 a subset of 225 complete genomes for DTS2. The accession numbers of all the genomes are  
125 indicated in Table S1.

## 126 2.2 Quality control procedure

127 The goal of this module is to remove genomes that do not conform with two types of basic  
128 requirements in terms of assembly and taxonomy. It is done by the `prepare` module after  
129 downloading the genomes, or by the `annotate` module before the annotation step (if the user  
130 did not use the `prepare` module). This latter option is useful when the goal is to analyse a pre-  
131 defined list of genomes, some of which are eventually not available in GenBank (e.g. in-house  
132 sequencing). The module receives as input a set of fasta sequences.

133 The first goal of this control procedure is to filter genomes in terms of sequence quality.  
134 Since there is usually no standard description of the quality of the sequence assembly in RefSeq  
135 genomes, the program infers it from the sequences. First, it is common usage to put stretches  
136 of 'N' to separate contigs in a same fasta sequence. To have a better idea of the sequence  
137 quality, and be able to do the analysis more efficiently, we first split sequences at each stretch  
138 of at least 5 'N' (this number of 5 can be changed by the user) to get one fasta entry per  
139 contig. Assuming that the user is analyzing genomes from the same species, those genomes  
140 should have relatively similar characteristics in terms of number of contigs and length. Hence,  
141 PanACoTA first calculates two key measures for each genome: the total number of contigs, and  
142 the L90 (the minimum number of contigs necessary to get at least 90% of the whole genome).  
143 Very high values of these two variables are usually an indication of low quality of sequencing or

144 assembling. They often result in the annotation of numerous truncated genes that spuriously  
145 increase the size of pangenomes (because a real gene is split into numerous open reading frames  
146 that are classed in distinct families). These poorly assembled genomes also complicate studies  
147 of comparative genomics whenever studying genetic linkage is important, because they are  
148 dominated by small contigs. The thresholds can be specified by the user. Values by default are  
149 set to less than 1000 contigs and L90 lower than 100. Genomes exceeding one of these values  
150 are excluded from the rest of the analysis.

151 The second part of the procedure is a filter dedicated to remove redundant and miss-classified  
152 genomes. This is done based on the genetic distance between pairs of genomes, as calculated  
153 by Mash [24]. We chose Mash for this distance filtering step because it can be computed very  
154 fast and is accurate for closely related genomes. Mash reduces each genome sequence to a  
155 sketch of representative k-mers, using the MinHash technique [25]. It then compares those  
156 sketches, instead of the full sequences. This output Mash distance  $D$  strongly correlates with  
157 alignment-based measures such as the Average Nucleotide Identity (ANI) which is based on  
158 whole-genome sequence comparisons using the blast algorithm [26]:  $D \approx 1 - ANI$ . For ANI  
159 in the range of 90–100%, the correlation with Mash distance is even stronger when increasing  
160 the sketch size. Since pangenomes are typically computed for a single bacterial species, we are  
161 here using Mash to discriminate genomes having at least 94% identity. A few recent programs  
162 have been published showing slightly more accuracy than Mash, but we found them too slow  
163 for the use as a systematic filter. For example, using 15 cores, FastANI [27] requires around  
164 1h15 to compare all pairs of 200 genomes (40,000 pairwise comparisons), where Mash with a  
165 sketch size of  $10^6$  does the task in less than 3 minutes. Hence, a user requiring a finer grade  
166 study of ANI may wish to post-analyse the data from FastANI, instead of running the `prepare`  
167 module. However, it is impractical to make all pairwise analyses of very large datasets where  
168 one often needs to perform millions of pairwise comparisons.

169 Bacterial species are usually defined as groups of genomes at more than 94% identity [28],  
170 and this will typically be used as the upper value for  $D$  (`max_mash_dist` is a modifiable param-  
171 eter that is fixed by default at 0.06). On the other extreme, genomes with very high similarity  
172 (corresponding to low Mash distances) provide very similar information. They can be excluded  
173 to lower the computational resources required for the analysis and to diminish eventual over-

174 sampling of certain clades, which could lead to biased results. PanACoTA sets `min_mash_dist`  
175 to  $10^{-4}$  by default, but this parameter can also be specified by the user. This distance represents  
176 one point change every ten genes on average and may be close to the sequencing and assembling  
177 accuracy of many draft genomes.

178 The two procedures, quality control and Mash filtering, are linked together. The information  
179 on the number of contigs and L90 is useful to chose the genome that is kept between a pair of  
180 very similar genomes. In summary, the control procedure works as follows:

- 181 • Genomes with an excessively high number of contigs or L90 are excluded.
- 182 • Genomes are primarily sorted by increasing L90 value, and secondarily by increasing  
183 number of contigs to produce a list ordered in terms of quality.
- 184 • The genomes are compared with Mash. For that, the first genome of the ordered list (the  
185 one with best quality) is compared to all the others. The ones which do not obey to the  
186 distance thresholds are discarded. The procedure then passes to the subsequent genome  
187 in the ordered list (if not rejected before), compares it to all remaining genomes, and  
188 discards those not respecting the thresholds. The process continues until the ordered list  
189 is exhausted.

190 The output of this module is a database with the genomes that passed the two steps of the  
191 quality control procedure. PanACoTA also provides a file listing the discarded genomes and  
192 why they were discarded.

## 193 **2.3 Annotation**

194 The annotation of the genomes is done by the `annotate` module of PanACoTA. The input is a  
195 database of fasta sequences, from the `prepare` module or directly provided by the user. If no  
196 information is given on the quality control of those genomes (number of contigs and L90), this  
197 quality control is done here (see previous section for more information on the quality control  
198 step).

199 The goal of this module is to provide a uniform annotation of the gene positions (and  
200 functions) across the dataset. PanACoTA annotates all genomes with Prokka [29]. The latter  
201 uses Prodigal [30] to identify gene positions. It then adds functional annotations using a series



202 of programs, including BLAST+ [31] to search for homologs in a database of proteins taken from  
203 Uniprot and HMMER3 [32] to search for proteins hitting selected profiles from TIGRFAM [33]  
204 and PFAM [34]. All annotated sequences are renamed using a standard sequence header format.  
205 The header of each gene contains 20 characters and provides human readable information on  
206 the genome and contig of the gene, its relative position in the genome, and if it is at the border  
207 of a contig (see Figure 2).

**Informations contained in name:**

Species  
Date  
Strain number  
Contig number  
Protein at the border (b) or inside (i) the contig  
Protein number

**Example:**

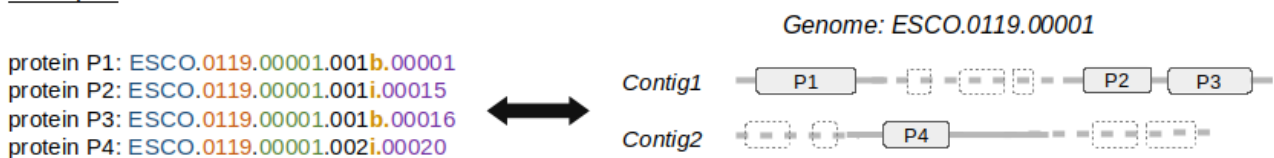

Figure 2: Description of the standard output header format for proteins annotated by PanA-CoTA.

208 If the user does not need the functional annotation, the module gives the possibility of  
209 running only the gene finding part, i.e. only running Prodigal. For very large datasets it  
210 is much faster to use this option and annotate a posteriori only one gene per family of the  
211 pangenome using Prokka or more complete annotation systems like InterProScan [35]. The  
212 output of this step consists in five files per genome: the original sequence, the genes, the  
213 proteins (all in fasta format), a gff file containing all annotations and a summary information  
214 file.

## 215 2.4 Identification of the pangenome

216 The pangenome is computed with the `pangenome` module of PanACoTA. The input is the set  
217 of all proteins from all genomes, e.g. the sequence files of the 'Proteins' folder generated by the  
218 `annotate` module.

219 The pangenome is the set of all protein families in the genomes. Its calculation involves com-  
220 parisons between all pairs of proteins, i.e. its complexity is to the square of the number of genes  
221 (and thus of genomes). To generate a reliable pangenome in a reasonable time, PanACoTA  
222 calls the MMseqs2 suite [20]. The `mmseqs search` module has a very good speed/sensitivity  
223 trade-off. In order to reduce time, it uses 3 consecutive search stages, with increasing sensitivity  
224 and decreasing speed. Everything is highly parallelized and optimized on multiple levels. The  
225 first step filters up to 99.9% of the sequences by eliminating high dissimilarities, i.e. sequences  
226 not having at least two consecutive kmer matches. The second step filters out another 99% of  
227 the remaining sequences using an ungapped alignment. This leaves a small amount of sequences  
228 to process with an optimized version of the Smith-Waterman alignment, where only scores are  
229 calculated, and not the full alignments.

230 We used the `mmseqs cluster` module included in MMseqs2 suite, with the default `Cascaded`  
231 `clustering` option. This module works in two main steps. It first clusters proteins using  
232 `linclust` [36], a linear time protein sequence clustering algorithm as a prefilter. Then, the  
233 representative sequences of this first step are handled by the `mmseqs search` module, and  
234 clustered according to its result. This second step is repeated three times, each time with a  
235 higher sensitivity at the `mmseqs search` algorithm module.

236 For the clustering stage, PanACoTA uses the `Connected component` mode, because it has  
237 provided results consistent with our previous methods. This mode uses transitive connections  
238 to merge pairs of homologous genes: all vertices accessible via a BFS algorithm are members  
239 of a cluster. Let's define the graph made from all pairwise comparisons between proteins as  
240 follows: each node is a protein and there is an edge between 2 proteins if they are similar  
241 (similarity beyond the given threshold). Then, two proteins are in the same family if we can  
242 find a path from one to the other in the graph. If desired, the user can choose any of two other  
243 clustering modes (`Greedy Set cover`, or `Greedy incremental`) using a dedicated parameter  
244 while launching the PanACoTA `pangenome` module. Importantly, the tuning of the options of  
245 `mmseqs2` allows the sequence similarity analyses to be exceedingly fast or extremely sensitive  
246 [20]. In PanACoTA the user can change the key parameters `-min-seq-id` and `-cluster-mode`,  
247 and re-run the `mmseqs cluster` module to explore their effect on the results. More specific  
248 `mmseqs2` parameters have, for the time being, to be used with the standalone version of the

249 program.

250 The output of this step is a pangenome file containing one line per family, with the list  
251 of all its members. PanACoTA also provides the quantitative and qualitative matrices of the  
252 pangenome, as well as a tabular file giving an overview of each family composition.

253 Note that, here, we do not take into account synteny between genes in the genomes, as we  
254 think that, for draft genomes, this has a limited interest. By exploring the families generated,  
255 we found very few and non-significant differences. However, if the user has very well assembled  
256 genomes, or has any particular reason to account for synteny, some tools have been developed,  
257 like panOCT [37] [38], SynerClust [39] or PANINI [40].

258 If the user wants to do genome-wide association studies, the output qualitative matrix can  
259 be directly used as input for TreeWAS [41].

## 260 **2.5 Identification of core and persistent genomes**

261 The classification of gene families present in a large number of taxa is done by the `corepers`  
262 module of PanACoTA. The input is a pangenome file, like the one generated by the `pangenome`  
263 module. In early studies, the pangenome matrix was used to identify the gene families present  
264 in all genomes in a single copy: the core genome. However, the increase of the number of  
265 genomes in the dataset tends to decrease drastically the size of the core genome. This is because  
266 sequencing or annotation errors as well as rare deleterious polymorphism in the populations  
267 lead to the rapid decrease of the number of core genes with the increase in the number of input  
268 genomes. To overcome this problem, one now commonly identifies the persistent genome. A  
269 family is in the persistent genome if it contains members from at least  $N\%$  of the genomes.  $N$  is  
270 defined by the user. The default value is 95% for datasets with more than 1000 genomes. The  
271 persistent genome is more robust to rare (true or artifactual) variants. On the other hand, if the  
272 goal of computing the persistent genome is to make a phylogenetic tree or analyze population  
273 genetics data, one may wish to produce sets with different thresholds. Indeed, a too high value  
274 will lead to a small set of persistent genes with few gaps that may be enough to infer a robust  
275 phylogeny. On the other side, this will exclude many gene families from other types of analyses,  
276 like detection of positive selection or recombination events. The definition of persistent genome  
277 may also vary, depending on the subsequent use of the data. PanACoTA defines three types of

278 persistent genomes (see Figure 3):

- 279 • Strict-persistent: a family that contains exactly 1 member in at least  $N\%$  genomes ( $N$   
280 = 100 means it is a core-family). This definition is particularly practical to reconstruct  
281 phylogenies without having to handle the existence of multiple copies per genome.
- 282 • Mixed-persistent: a family where at least  $N\%$  of the genomes have exactly 1 member,  
283 and other genomes have either 0, either several members in the family. This definition is  
284 intermediate between the other two, i.e. it includes the strict-persistent and is included  
285 by the multi-persistent.
- 286 • Multi-persistent: a family with at least one member in  $N\%$  of the genomes. This definition  
287 is interesting to analyse patterns of diversification of nearly ubiquitous protein families.

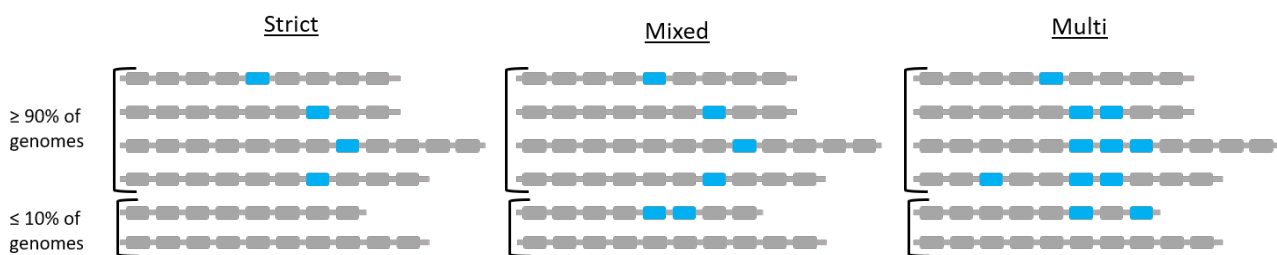

Figure 3: Different types of persistent genomes proposed by PanACoTA, with a threshold of  $N = 90\%$ .

288 The mixed and multi-persistent definitions are useful to include the gene families with  
289 variable numbers of copies in a small (mixed) or large (multi) number of genomes when studying  
290 the evolution of nearly ubiquitous gene families. It can be useful when one protein was split  
291 in several parts in a few genomes because of sequencing or assembly error(s). This protein  
292 family is discarded from the strict-persistent genome, while included in the mixed (and multi)  
293 persistent genomes.

294 One should note that the module `corepers` does the re-analysis of the pangenome and  
295 therefore it does not use a reference genome whose choice can be questionable. Re-running the  
296 module is very fast, because it only requires the re-analysis of the pangenome matrix. Hence,  
297 it is easy and fast to re-run the module with different parameters in different analysis to check  
298 how they change the final result.

299 The output of this module is a file containing the persistent families of proteins.

300 Note that if the user wants to identify the persistent genome using a statistical approach  
301 rather than using fixed thresholds, the gff file generated by `annotate` module is compatible  
302 with PPanGGOLiN [21]. This software generates a persistent genome corresponding to our  
303 multi-persistent version of the persistent genome (multigenic families are allowed).

## 304 2.6 Multiple alignments of the persistent gene families

305 The alignment of the persistent gene families is done by the `align` module of PanACoTA. Its  
306 input is a persistent genome coming from the `corepers` module, or independently provided by  
307 the user. When using the strict-persistent genome, all genes are aligned. When using the other  
308 definitions of persistent genomes, some genomes can lack a gene or have it in multiple copies.  
309 To produce phylogenetic trees from these alignments, such cases must be handled beforehand.  
310 When a genome lacks a member or has more than one member (mixed or multi persistent) of  
311 a given gene family, PanACoTA adds a stretch of gaps ('-') of the same length as the other  
312 aligned genes. Adding a few "-" has little impact on phylogeny reconstruction. For example,  
313 it has been showed that adding up to 60% of missing data in the alignment matrix could  
314 still result in informative alignments [42]. In our experience, when this approach is applied to  
315 within-species pangenomes, it usually incorporates less than 1% of gaps. The effect of missing  
316 data should thus be negligible relative to the advantage of using the phylogenetic signal from  
317 many more genes (i.e. in contrast to using the strict-persistent genome). Alignments are more  
318 accurate when done at the level of the protein sequence. This has the additional advantage of  
319 producing codon-based nucleotide alignments that can be used to study selection pressure on  
320 coding sequences. Hence, PanACoTA translates sequences, aligns the corresponding proteins  
321 and then back-translates them to DNA to get a nucleotide alignment. This last step constitutes  
322 in the replacement of each amino acid by the original codon. Hence, at the end of the process,  
323 the aligned sequences are identical to the original sequences.

324 PanACoTA does multiple sequence alignment using MAFFT [10] as it is often benchmarked  
325 as one of the most accurate multiple alignment programs available and one of the fastest [43]).  
326 It has options that allow to make much faster alignments, at the cost of some accuracy, to  
327 handle very large datasets. This loss of accuracy is usually low for very similar sequences as  
328 it is the case of orthologous gene families within species, and means that PanACoTA can very

329 rapidly align the persistent genome.

330 This module returns several output files: the concatenate of the alignments of all families  
331 to be used for tree inference, and, for each core/persistent genome family, a file with its gene  
332 and protein sequences aligned.

## 333 2.7 Tree reconstruction

334 The phylogenetic inference is done with the `tree` module of PanACoTA. It uses as input the  
335 alignments of the `align` module or any other alignments in Fasta format.

336 This is the part that takes most time in the entire pipeline, because the time required for  
337 phylogenetic inference grows very fast with the size of the dataset. Even efficient implementa-  
338 tions of the maximum likelihood analyses scale with the product of the number of sites and the  
339 number of taxa, which is a problem in the case of large datasets (thousands of taxa, with more  
340 than ten thousands sites for each one). PanACoTA proposes several different methods to obtain  
341 a phylogeny: IQ-TREE [44], FastTreeME [45], fastME [46] and Quicketree [47]. Whatever the  
342 software used, the `tree` module takes as input a nucleotide alignment in Fasta format (like, for  
343 example, the output of `align` module), and returns a tree in Newick format. According to its  
344 needs, the user can choose one of these methods to infer its phylogenetic tree. These trees can  
345 be used to build more rigorous phylogenetic inference using methods that are more demanding  
346 in computational resources, e.g. by changing the options of IQ-TREE.

## 347 2.8 Implementation and availability

348 PanACoTA was developed in Python3, trying to follow the best practices for scientific software  
349 development [48] [49]. For that, the software is versioned using git, allowing the tracking of  
350 all changes in source code during PanACoTA's development. It is freely distributed under the  
351 open-source AGPL licence (making it usable by many organizations) and can be downloaded  
352 from <https://github.com/gem-pasteur/PanACoTA>.

353 Hosting it on GitHub allows for issue tracking, i.e. users can report bugs, make suggestions  
354 or, for developers, participate to the software improvement. To provide a maintainable and  
355 reliable software, we set up continuous integration process: each time a modification is pushed,  
356 there is an automatic software installation checking, unit tests are done, and, if necessary, an

357 updated version of the documentation is generated, as well as an update of the singularity  
 358 image on Singularity Hub.

359 As introduced just before, we also provide a complete documentation, including a step by  
 360 step tutorial, based on provided genome examples, so that the user can quickly get started.  
 361 It also contains more detailed sections on each module, aiming at helping users to tune all  
 362 parameters, in order to adapt the run to more specific needs. This documentation also includes  
 363 a 'developer' section, addressed to developers wanting to participate in the project.

364 During its execution, PanACoTA provides logging information, so that user can see real-  
 365 time execution progress (a `quiet` parameter is also proposed for users needing empty stdout  
 366 and stderr). This also provides log file(s) to keep track on what was ran (command-line used,  
 367 time stamp, parameters used etc.).

### 368 3 Results and discussion

369 All execution times mentioned in this section correspond to wall clock time on 8 cores (except  
 370 when the number of cores is given). A summary of all execution times can be found in Table 1.

| MODULE                               | STEP                     | DTS1 (3980 genomes) | DTS2 (225 genomes) |
|--------------------------------------|--------------------------|---------------------|--------------------|
| <b>prepare</b>                       | <i>downloading</i>       | 1h (5805 genomes)   | 3min (266 genomes) |
|                                      | <i>quality control</i>   | <4min               | ~15sec             |
|                                      | <i>filter</i>            | 20min               | ~1min              |
| <b>annotate</b>                      | <i>with Prokka</i>       | 5 days              | 10h                |
|                                      | <i>with Prodigal</i>     | 6h                  | 30min              |
| <b>pangenome</b>                     |                          | 30min               | 1min               |
| <b>corepers (1 core)</b>             |                          | 1min                | 5sec               |
| <b>align</b>                         | <i>strict-persistent</i> | 3h                  | 10min              |
|                                      | <i>mixed-persistent</i>  | 7h                  | 11min              |
| <b>Tree (IQ-TREE)<br/>(28 cores)</b> | <i>strict-persistent</i> | 7h (40GB RAM)       | 3min10             |
|                                      | <i>mixed-persistent</i>  | 24h (90GB RAM)      | 3min30             |

Table 1: Summary of execution times by (sub)module

#### 371 3.1 Download and preparation of genome sequences

372 The first module of PanACoTA was used to download all genomes of *Klebsiella pneumoniae*  
 373 using the TaxID 573. It took approximately 1h to download the 5805 *Klebsiella pneumoniae*  
 374 genome sequences (including 266 complete genomes). We used the module `annotate` to make

375 the quality control of those 5805 strains. For this study, we used as thresholds: L90<100 and  
376 number of contigs<999. The computation of L90, number of contigs and genome size, and  
377 the subsequent procedure of discarding genomes according to the thresholds took less than 4  
378 minutes. This step discarded 233 draft genomes, leaving 5572 for further analysis (see Figure 4).  
379 When the threshold on the number of contigs was decreased by half (number of contigs<500),  
380 only 52 more genomes were removed (see Figure 4b). To define the best thresholds to the  
381 analysis, the user can preview its dataset quality with a 'dry-run' of the `annotate` module.  
382 Then, the user can launch the real analysis, from `prepare` or `annotate` with the adapted  
383 thresholds.

384 The analysis of genetic distances across pairs of genomes is performed by Mash (K-mer  
385 size of 21 (default), and sketches of at most 10000 non-redundant min-hashed k-mers). A  
386 total of 1592 genomes (including 41 complete genomes) did not respect the distance thresholds  
387 (`max_mash_dist` = 0.06 and `min_mash_dist`  $1e^{-4}$ ). The vast majority (1448) were too similar  
388 to other genomes, whereas 144 were too distant from other strains to be regarded as bona fide  
389 *Klebsiella pneumoniae* genomes (figure 5).

390 Some species can even be defined with narrower ANI values. For example, to identify bona  
391 fide *Klebsiella pneumoniae* genomes, Kleborate (<https://github.com/katholt/Kleborate>) uses  
392 Mash to compare the given assembly to a curated set of *Klebsiella* assemblies from NCBI. It  
393 considers a Mash distance of  $\leq 0.01$  as a strong species match, and a Mash distance between  
394 0.01 and 0.03 as a weak match. With our DTS1, Kleborate would have only removed 22  
395 more genomes, that it identifies as *Klebsiella quasipneumoniae subspecies similipneumoniae*.  
396 Our method, which is designed for any species, is thus quite consistent with Kleborate results  
397 regarding the specific case of *K. pneumoniae* genomes.

398 Three genomes showed an ANI less than 84% identity, meaning they may not even be  
399 from the same genus, which emphasizes the necessity of this kind of analysis before computing  
400 a pangenome. They were removed from the analysis (GCF\_900451665.1, GCF\_900493335.1  
401 and GCF\_900493505.1). Finally, these filters left 3980 genomes in the analysis, with an average  
402 of 5307 genes per genome, which will be called the reference database DTS1. Among them,  
403 there are 225 complete genomes that form the dataset DTS2 (see Figure 6).

404 The functional annotation part is by far the slowest of the first modules. On a typical 5



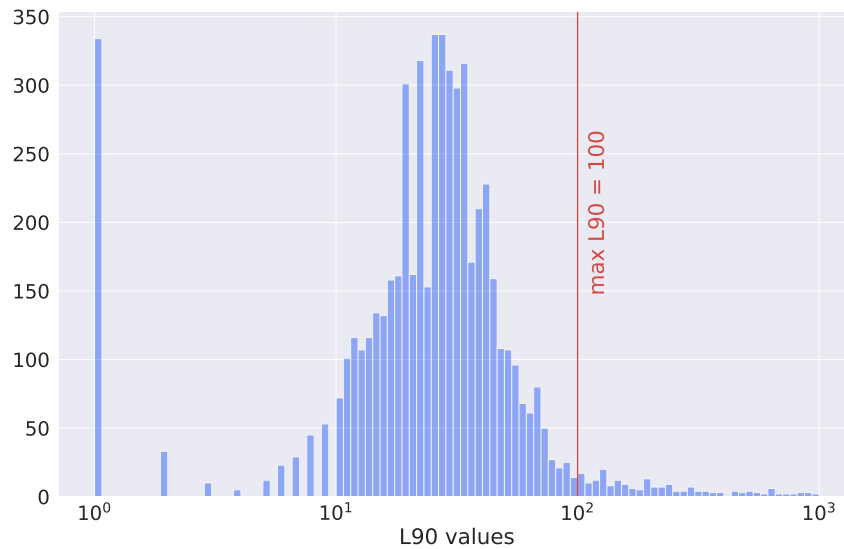

(a)

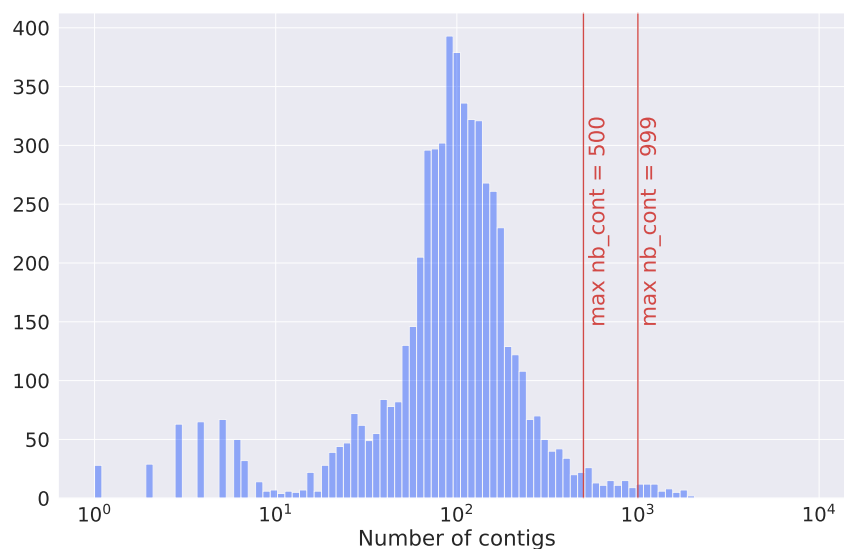

(b)

Figure 4: Histograms describing the features of the 5805 *K. pneumoniae* genomes downloaded from Refseq. (a) Distribution of L90 values. (b) Distribution of the number of contigs per genome.

405 Mb genome, giving 2 cores to Prokka, gene finding takes around 40 seconds and functional  
406 annotation around 7 minutes.

407 The annotation of the genomes with Prokka 1.11 took approximately 1min 50s per genome,  
408 i.e. around 5 days for the whole dataset. For comparison, we re-did the analysis with the option  
409 of restricting the analysis to prodigal 2.60. This analysis took less than 6h in total (annotation

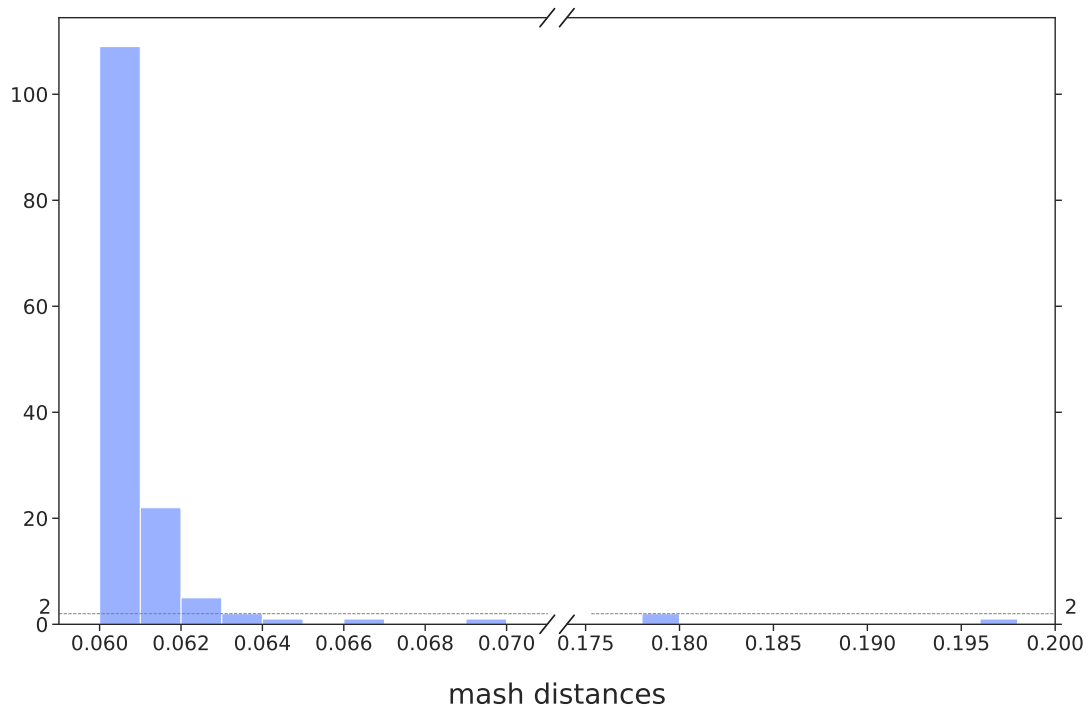

Figure 5: Distribution of Mash distances for the 5572 genomes respecting the L90 and number of contigs thresholds, but having a Mash distance higher than the threshold (0.06).

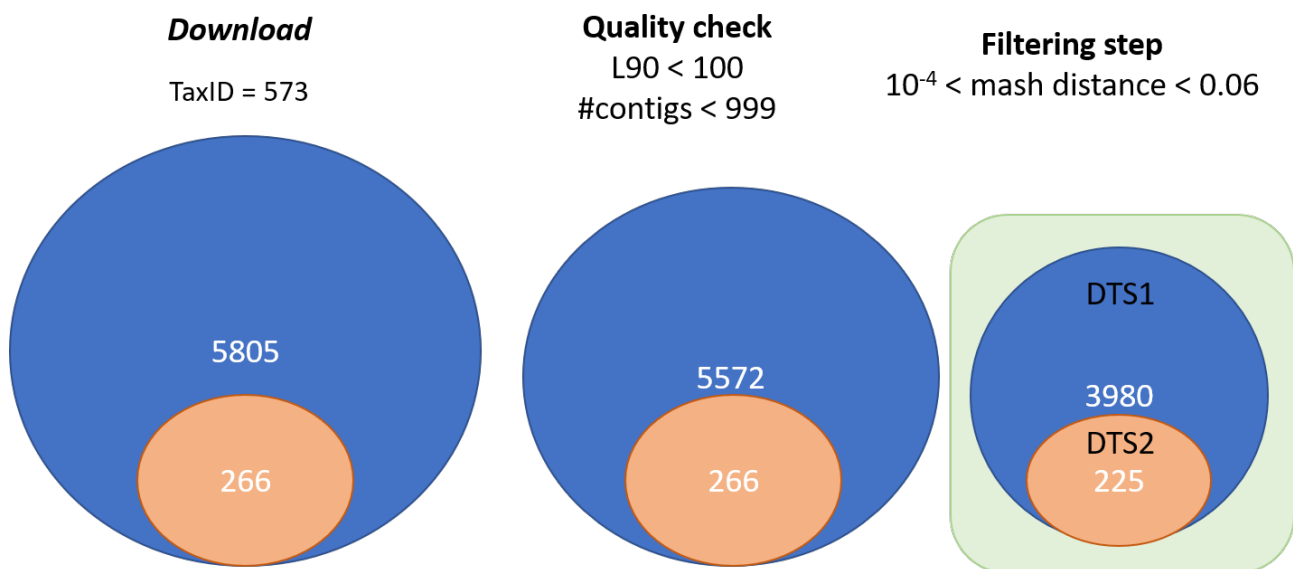

Figure 6: Summary of the procedure to construct DTS1 and DTS2.

410 + formatting of all 3980 genomes), which corresponds to an average of 6 seconds per genome.  
 411 In general, this shows that making a simple syntactic annotation leads to a considerable gain  
 412 of time. Assuming that genes from the same pangenome family have similar functions, one can  
 413 annotate one protein per family at the end of the process and save considerable time.

## 414 3.2 Building pangenomes

415 We used MMseqs2 Release 11-e1a1c. The 3980 DTS1 genomes contain 20,765,062 proteins.  
416 It took less than 30min to create the protein database in the MMseqs2 format, cluster them  
417 (with at least 80% identity and 80% coverage of query and target, and other parameters kept as  
418 default), and retrieve the pangenome matrices. The pangenome of the smaller DTS2 dataset of  
419 225 genomes, 1,190,485 proteins, was computed in less than one minute. The DTS1 pangenome  
420 has 86607 families. Among them, 35348 (40%) are singletons (found in a single genome), which  
421 is concordant with values observed in *Escherichia coli* [50]. In DTS2 we found 24473 families,  
422 including 8975 (37%) singletons.

423 The comparison of these two pangenomes is interesting because it reveals the robustness of  
424 the method to changes in sampling size, as summarized in Figure 7. A total of 2147 families  
425 contain only members present in both DTS1 and DTS2. This means that, for those families,  
426 even with all proteins of DTS1, only proteins from DTS2 were clustered together. Among those  
427 families, 2122 are exactly the same in both pangenomes, whereas only 25 families were split  
428 in the DTS1 pangenome family relative to the DTS2 pangenome. In that case, they are split,  
429 most of the time, into two different families of DTS1. This shows that the clustering procedure  
430 is quite robust to the addition of a very large number of genomes.

431 Most important, we observed a total of 22744 families (that is more than 92% of all  
432 DTS2 families) that are identical between the independent analysis of the DTS1 and DTS2  
433 pangenomes. Identical here means that the DTS2 pangenome gene family is included in a  
434 DTS1 pangenome gene family, and the other members of this DTS1 pangenome family are only  
435 members of genomes not present in DTS2. Furthermore, around half of the remaining families  
436 from the DTS2 pangenome are included in a DTS1 pangenome gene family, which contains a  
437 few other proteins from DTS2 genomes. Finally, only 187 gene families of the DTS2 pangenome  
438 were split into 2 or 3 different families of DTS1 pangenome. In other words, 24286 families  
439 (more than 99%) of DTS2 pangenome are subsets of DTS1 gene families. In conclusion, the  
440 construction of pangenome families is robust to large variations in the number of input genomes  
441 (see Figure 7).

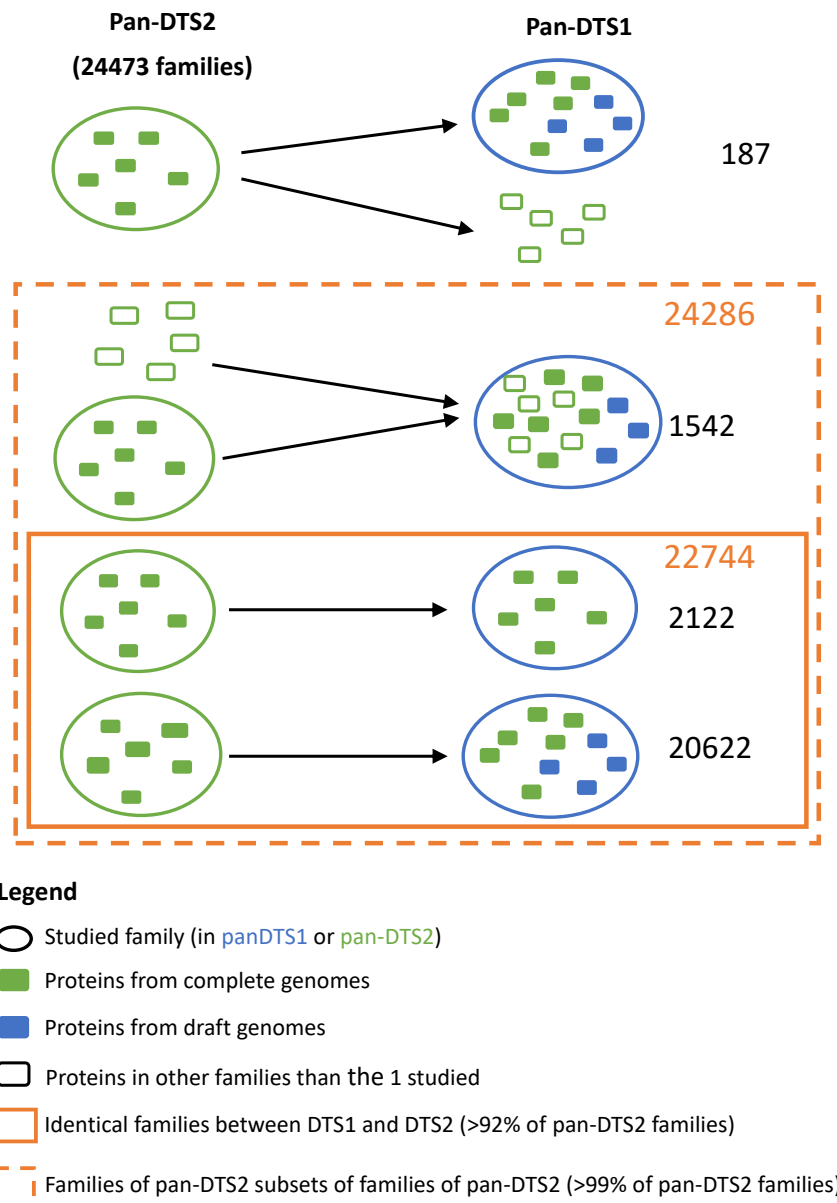

Figure 7: Comparison of the pangenomes generated by PanACoTA for both DTS1 and DTS2.

### 442 3.3 Core and persistent genomes

443 This part of the analysis is very fast. Using only 1 core, it took around one minute to generate  
 444 a core or persistent genome from DTS1 pangenome. PanACoTA provides a core genome and  
 445 three different measures of persistent genome (see Figure 3). The strict-persistent genome  
 446 corresponds to cases when the family is present in a single copy in 99% genomes and absent  
 447 from the others. In DTS2, the set of complete genomes, the difference between the core and  
 448 strict-persistent genome is appreciable (2238 versus 3295 families), i.e. the persistent genome is  
 449 50% larger (see Figure 8). The difference becomes huge when the analysis is done on the much

450 larger and less accurate DTS1 dataset, where the two datasets vary by more than one order of  
451 magnitude (79 versus 1418 families). In such large datasets of draft genomes the analysis of  
452 the core genome is not very useful.

453 The mixed-persistent genome includes the families present in a single copy in 99% genomes  
454 and present (potentially in several copies) or absent from the others. It includes the strict-  
455 persistent genome and is not much larger than the latter in the small DTS2 dataset. Yet,  
456 the difference is much larger in the DTS1 dataset (see Figure 8). While the mixed-persistent  
457 genome is 65% percent of the average genome in DTS1, the strict-persistent is only 27% percent  
458 in the same dataset. This shows the relevance of using definitions of the core genome adapted  
459 to the dataset in order to build robust phylogenetic trees or to analyse patterns of genetic  
460 diversification and natural selection.

461 Finally, PanACoTA also computes a multi-persistent genome that includes all gene families  
462 present in at least 99% genomes, independently of the copy number. It includes all the other  
463 sets and is not much larger than the mixed-persistent genome (see Figure 8). Yet, it includes  
464 interesting families. An analysis of these reveals many genes encoding regulators, transporters  
465 and enzymes that are nearly ubiquitous, but often present in multiple copies. As a rule, this  
466 definition is interesting to study gene families present in most genomes, but present in very  
467 different copy number. On the other hand, it is typically not very useful for phylogenetic  
468 inference. Since all these sets can be computed very rapidly, it's straightforward to compute  
469 them all and use them for different types of analyses.

### 470 **3.4 Phylogenetic tree inference**

471 PanACoTA ran mafft v.7.467 using `--auto` option to align all families. For DTS1, it selected  
472 the FFT-NS-2 method, while for DTS2, it selected FFT-NS-i method. This was done with  
473 both the strict-persistent (1418 families) and the mixed-persistent (3441 families). It took 3h  
474 (resp. 7h) to align all the families of the strict-persistent (resp. mixed-persistent), giving, for  
475 each one, the input file for tree inference.

476 For tree inference, PanACoTA used IQ-TREE multicore version 2.0.6, with `-fast` option.  
477 For the tree based on the alignment of the strict-persistent (3980 sequences, 1418 families  
478 corresponding to 1,438,179 positions), it took around 7h on 28 cores, requiring 38GB of RAM.

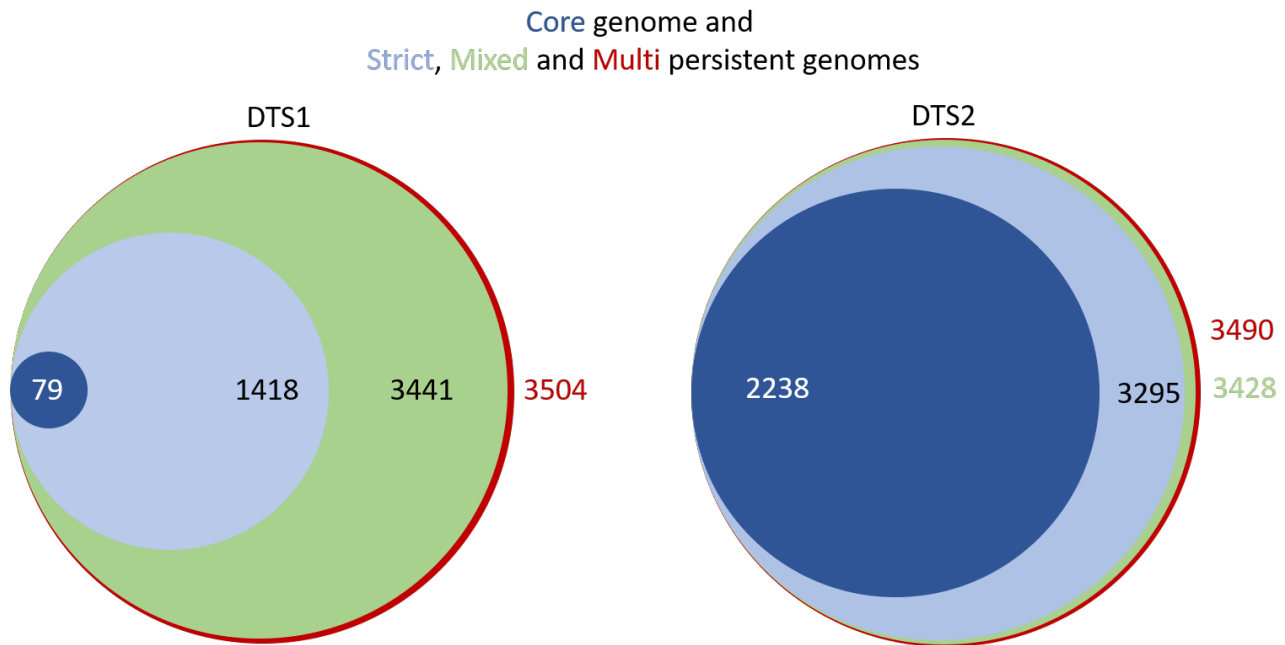

Figure 8: Comparison of the sizes of the core genome and the 3 different types of persistent genomes, for both DTS1 and DTS2. Areas of circles are proportional to the size of the dataset.

479 For the tree based on the alignment of the mixed-persistent (3980 sequences, 3441 families  
480 corresponding to 3,393,006 positions), it took 24h using 28 cores, requiring 88GB of RAM.

481 We then wished to understand the differences in phylogenetic inference in terms of the  
482 method used to define the persistent genome (strict and mixed persistent). We computed the  
483 patristic distance matrix for each tree and a Pearson correlation test showed that they are  
484 strongly correlated ( $\text{cor} = 0.99138$ ,  $p < 2.2e-16$ ). This shows that the distances provided by  
485 the two methods are very similar. Hence, if the strict persistent is large enough to generate a  
486 phylogenetic tree, it provides adequate distances between genomes. Aligning all mixed persistent  
487 families would just take much more time, for a similar result. However, if one is interested in  
488 having a robust tree topology, one should use the larger (and computationally costlier) dataset.  
489 Indeed, the analyses of Robinson-Foulds distance with R `phangorn` package shows a branch-  
490 weighted distance of 0.43 and an absolute distance of 2892 [51]. This is because some lineages of  
491 *K. pneumoniae* account for a large fraction of the data and these parts of the tree require long  
492 informative multiple alignments to produce accurate topologies. Accordingly, the differences  
493 in topology between the trees using the DTS2 dataset, which have much larger average branch  
494 lengths, show much smaller values of topological distances between the two datasets of persistent  
495 genome ( $\text{RF}=78$ ,  $\text{wRF}=0.027$ ).

496 Some researchers use methods to detect recombination in genomes, remove the recombi-

497 nation tracts, and then redo the analyses. This can be done outside PanACoTA by querying  
498 the multiple alignments before proceeding to the phylogenetic inference. Yet, previous results  
499 have shown that such procedures tend to distort phylogenetic inference at a larger extent than  
500 simply using all the information in the multiple alignments [52] [53]), and this explains why we  
501 have not included such an option on PanACoTA.

## 502 4 Conclusion

503 PanACoTA is a pipeline for those wanting to test hypotheses or explore genomic patterns using  
504 large scale comparative genomics. We hope that it will be particularly useful for those wishing to  
505 use a rapid, accurate and standardized procedure to obtain the basic building blocks of typical  
506 analyses of genetic variation at the species level. We built the pipeline having modularity in  
507 mind, so that users can produce multiple variants of the analyses at each stage. We also paid  
508 particularly care with the portability and evolvability of the software. These two characteristics,  
509 modularity and evolvability, will facilitate the implementation of novel procedures in the future.

## 510 5 Acknowledgements

511 We thank Marie TOUCHON, Matthieu HAUDIQUET and Rémi DENISE for comments,  
512 suggestions, and bug reports, and Blaise LI for his help with Singularity. This work was  
513 partly supported by the ANR Salmo\_Prophages (ANR-16-CE16-0029), the Inception program  
514 (PIA/ANR-16-CONV-0005), and the Equipe FRM (EQU201903007835).

## 515 References

- 516 [1] G. Vernikos, D. Medini, D. R. Riley, and H. Tettelin, “Ten years of pan-genome analyses,”  
517 *Current Opinion in Microbiology*, vol. 23, pp. 148–154, feb 2015.
- 518 [2] H. Tettelin and D. Medini, *The pangenome: Diversity, dynamics and evolution of genomes*.  
519 Springer International Publishing, jun 2020.
- 520 [3] M. V. Larsen, S. Cosentino, S. Rasmussen, C. Friis, H. Hasman, R. L. Marvig, L. Jels-  
521 bak, T. Sicheritz-Pontén, D. W. Ussery, F. M. Aarestrup, and O. Lund, “Multilocus

- 522 sequence typing of total-genome-sequenced bacteria,” *Journal of Clinical Microbiology*,  
523 vol. 50, pp. 1355–1361, apr 2012.
- 524 [4] S. Baker, N. Thomson, F. X. Weill, and K. E. Holt, “Genomic insights into the emergence  
525 and spread of antimicrobial-resistant bacterial pathogens,” *Science*, vol. 360, pp. 733–738,  
526 may 2018.
- 527 [5] T. J. Treangen and M. Pop, “You can’t always sequence your way out of a tight spot,”  
528 *EMBO reports*, vol. 19, p. e47036, dec 2018.
- 529 [6] S. K. Sheppard, D. S. Guttman, and J. R. Fitzgerald, “Population genomics of bacterial  
530 host adaptation,” *Nature Reviews Genetics*, vol. 19, pp. 549–565, sep 2018.
- 531 [7] D. Falush, “Bacterial genomics: Microbial GWAS coming of age,” *Nature Microbiology*,  
532 vol. 1, p. 16059, apr 2016.
- 533 [8] L. B. Zeng, D. Wang, N. Y. Hu, Q. Zhu, K. Chen, K. Dong, Y. Zhang, Y. F. Yao, X. K. Guo,  
534 Y. F. Chang, and Y. Z. Zhu, “A novel pan-genome reverse vaccinology approach employing  
535 a negative-selection strategy for screening surface-exposed antigens against leptospirosis,”  
536 *Frontiers in Microbiology*, vol. 8, p. 396, mar 2017.
- 537 [9] B. Buchfink, C. Xie, and D. H. Huson, “Fast and sensitive protein alignment using DIA-  
538 MOND,” *Nature Methods*, vol. 12, pp. 59–60, jan 2014.
- 539 [10] K. Katoh and D. M. Standley, “MAFFT Multiple Sequence Alignment Software Version  
540 7: Improvements in performance and usability,” *Molecular Biology and Evolution*, vol. 30,  
541 pp. 772–780, apr 2013.
- 542 [11] P. Bradley, H. C. den Bakker, E. P. Rocha, G. McVean, and Z. Iqbal, “Ultrafast search of  
543 all deposited bacterial and viral genomic data,” *Nature Biotechnology*, vol. 37, pp. 152–159,  
544 feb 2019.
- 545 [12] Y. Kim, C. Gu, H. U. Kim, and S. Y. Lee, “Current status of pan-genome analysis for  
546 pathogenic bacteria,” *Current Opinion in Biotechnology*, vol. 63, pp. 54–62, jun 2020.
- 547 [13] R. C. Edgar, “Search and clustering orders of magnitude faster than BLAST,” *Bioinfor-  
548 matics*, vol. 26, pp. 2460–2461, aug 2010.



- 549 [14] L. Fu, B. Niu, Z. Zhu, S. Wu, and W. Li, “CD-HIT: Accelerated for clustering the next-  
550 generation sequencing data,” *Bioinformatics*, vol. 28, pp. 3150–3152, dec 2012.
- 551 [15] A. J. Page, C. A. Cummins, M. Hunt, V. K. Wong, S. Reuter, M. T. Holden, M. Fookes,  
552 D. Falush, J. A. Keane, and J. Parkhill, “Roary: Rapid large-scale prokaryote pan genome  
553 analysis,” *Bioinformatics*, vol. 31, pp. 3691–3693, may 2015.
- 554 [16] G. Tonkin-Hill, N. MacAlasdair, C. Ruis, A. Weimann, G. Horesh, J. A. Lees, R. A.  
555 Gladstone, S. Lo, C. Beaudoin, R. A. Floto, S. D. Frost, J. Corander, S. D. Bentley,  
556 and J. Parkhill, “Producing polished prokaryotic pangenomes with the Panaroo pipeline,”  
557 *Genome biology*, vol. 21, p. 180, jul 2020.
- 558 [17] N. M. Chaudhari, V. K. Gupta, and C. Dutta, “BPGA-an ultra-fast pan-genome analysis  
559 pipeline,” *Scientific Reports*, vol. 6, pp. 1–10, apr 2016.
- 560 [18] W. Ding, F. Baumdicker, and R. A. Neher, “panX: pan-genome analysis and exploration,”  
561 *Nucleic acids research*, vol. 46, p. e5, jan 2018.
- 562 [19] S. Cosentino and W. Iwasaki, “SonicParanoid: Fast, accurate and easy orthology infer-  
563 ence,” *Bioinformatics*, vol. 35, pp. 149–151, jan 2019.
- 564 [20] M. Steinegger and J. Söding, “MMseqs2 enables sensitive protein sequence searching for  
565 the analysis of massive data sets,” *Nature Biotechnology*, vol. 35, pp. 1026–1028, nov 2017.
- 566 [21] G. Gautreau, A. Bazin, M. Gachet, R. Planel, L. Burlot, M. Dubois, A. Perrin, C. Médigue,  
567 A. Calteau, S. Cruveiller, C. Matias, C. Ambroise, E. P. Rocha, and D. Vallenet, “PPanG-  
568 GOLiN: Depicting microbial diversity via a partitioned pangenome graph,” *PLoS Computa-  
569 tional Biology*, vol. 16, p. e1007732, mar 2020.
- 570 [22] S. C. Bayliss, H. A. Thorpe, N. M. Coyle, S. K. Sheppard, and E. J. Feil, “PIRATE:  
571 A fast and scalable pangenomics toolbox for clustering diverged orthologues in bacteria,”  
572 *GigaScience*, vol. 8, pp. 1–9, oct 2019.
- 573 [23] K. E. Holt, H. Wertheim, R. N. Zadoks, S. Baker, C. A. Whitehouse, D. Dance, A. Jenney,  
574 T. R. Connor, L. Y. Hsu, J. Severin, S. Brisse, H. Cao, J. Wilksch, C. Gorrie, M. B.  
575 Schultz, D. J. Edwards, K. Van Nguyen, T. V. Nguyen, T. T. Dao, M. Mensink, V. Le

- 576 Minh, N. T. K. Nhu, C. Schultsz, K. Kuntaman, P. N. Newton, C. E. Moore, R. A.  
577 Strugnell, and N. R. Thomson, “Genomic analysis of diversity, population structure, vir-  
578 ulence, and antimicrobial resistance in *Klebsiella pneumoniae*, an urgent threat to public  
579 health,” *Proceedings of the National Academy of Sciences of the United States of America*,  
580 vol. 112, pp. E3574–E3581, jul 2015.
- 581 [24] B. D. Ondov, T. J. Treangen, P. Melsted, A. B. Mallonee, N. H. Bergman, S. Koren,  
582 and A. M. Phillippy, “Mash: fast genome and metagenome distance estimation using  
583 MinHash.,” *Genome biology*, vol. 17, no. 1, p. 132, 2016.
- 584 [25] A. Z. Broder, “On the resemblance and containment of documents,” in *Proceedings of the*  
585 *International Conference on Compression and Complexity of Sequences*, pp. 21–29, 1997.
- 586 [26] S. F. Altschul, W. Gish, W. Miller, E. W. Myers, and D. J. Lipman, “Basic local alignment  
587 search tool,” *Journal of Molecular Biology*, vol. 215, no. 3, pp. 403–410, 1990.
- 588 [27] C. Jain, L. M. Rodriguez-R, A. M. Phillippy, K. T. Konstantinidis, and S. Aluru, “High  
589 throughput ANI analysis of 90K prokaryotic genomes reveals clear species boundaries,”  
590 *Nature Communications*, vol. 9, pp. 1–8, nov 2018.
- 591 [28] K. T. Konstantinidis and J. M. Tiedje, “Genomic insights that advance the species def-  
592 inition for prokaryotes,” *Proceedings of the National Academy of Sciences of the United*  
593 *States of America*, vol. 102, pp. 2567–2572, feb 2005.
- 594 [29] T. Seemann, “Prokka: rapid prokaryotic genome annotation.,” *Bioinformatics*, vol. 30,  
595 pp. 2068–9, jul 2014.
- 596 [30] D. Hyatt, G. L. Chen, P. F. LoCascio, M. L. Land, F. W. Larimer, and L. J. Hauser,  
597 “Prodigal: Prokaryotic gene recognition and translation initiation site identification,” *BMC*  
598 *Bioinformatics*, vol. 11, p. 119, mar 2010.
- 599 [31] C. Camacho, G. Coulouris, V. Avagyan, N. Ma, J. Papadopoulos, K. Bealer, and T. L.  
600 Madden, “BLAST+: Architecture and applications,” *BMC Bioinformatics*, vol. 10, p. 421,  
601 dec 2009.

- 602 [32] S. R. Eddy, “Accelerated profile HMM searches,” *PLoS Computational Biology*, vol. 7,  
603 p. e1002195, oct 2011.
- 604 [33] J. D. Selengut, D. H. Haft, T. Davidsen, A. Ganapathy, M. Gwinn-Giglio, W. C. Nelson,  
605 A. R. Richter, and O. White, “TIGRFAMs and Genome Properties: Tools for the assign-  
606 ment of molecular function and biological process in prokaryotic genomes,” *Nucleic Acids*  
607 *Research*, vol. 35, p. D260, jan 2007.
- 608 [34] S. El-Gebali, J. Mistry, A. Bateman, S. R. Eddy, A. Luciani, S. C. Potter, M. Qureshi,  
609 L. J. Richardson, G. A. Salazar, A. Smart, E. L. Sonnhammer, L. Hirsh, L. Paladin,  
610 D. Piovesan, S. C. Tosatto, and R. D. Finn, “The Pfam protein families database in 2019,”  
611 *Nucleic Acids Research*, vol. 47, pp. D427–D432, jan 2019.
- 612 [35] P. Jones, D. Binns, H. Y. Chang, M. Fraser, W. Li, C. McAnulla, H. McWilliam, J. Maslen,  
613 A. Mitchell, G. Nuka, S. Pesseat, A. F. Quinn, A. Sangrador-Vegas, M. Scheremetjew,  
614 S. Y. Yong, R. Lopez, and S. Hunter, “InterProScan 5: Genome-scale protein function  
615 classification,” *Bioinformatics*, vol. 30, pp. 1236–1240, may 2014.
- 616 [36] M. Steinegger and J. Söding, “Clustering huge protein sequence sets in linear time,” *Nature*  
617 *Communications*, vol. 9, pp. 1–8, dec 2018.
- 618 [37] D. E. Fouts, L. Brinkac, E. Beck, J. Inman, and G. Sutton, “PanOCT: Automated cluster-  
619 ing of orthologs using conserved gene neighborhood for pan-genomic analysis of bacterial  
620 strains and closely related species,” *Nucleic Acids Research*, vol. 40, p. e172, dec 2012.
- 621 [38] J. M. Inman, G. G. Sutton, E. Beck, L. M. Brinkac, T. H. Clarke, and D. E. Fouts,  
622 “Large-scale comparative analysis of microbial pan-genomes using PanOCT,” *Bioinfor-*  
623 *matics*, vol. 35, pp. 1049–1050, mar 2019.
- 624 [39] C. H. Georgescu, A. L. Manson, A. D. Griggs, C. A. Desjardins, A. Pironti, I. Wapinski,  
625 T. Abeel, B. J. Haas, and A. M. Earl, “SynerClust: a highly scalable, synteny-aware  
626 orthologue clustering tool,” *Microbial genomics*, vol. 4, p. e000231, nov 2018.
- 627 [40] K. Abudahab, J. M. Prada, Z. Yang, S. D. Bentley, N. J. Croucher, J. Corander, and  
628 D. M. Aanensen, “PANINI: Pangenome neighbour identification for bacterial populations,”  
629 *Microbial Genomics*, vol. 5, p. e000220, apr 2019.

- 630 [41] C. Collins and X. Didelot, “A phylogenetic method to perform genome-wide association  
631 studies in microbes that accounts for population structure and recombination,” *PLoS Com-  
632 putational Biology*, vol. 14, p. e1005958, feb 2018.
- 633 [42] A. Filipinski, O. Murillo, A. Freydenzon, K. Tamura, and S. Kumar, “Prospects for build-  
634 ing large timetrees using molecular data with incomplete gene coverage among species,”  
635 *Molecular Biology and Evolution*, vol. 31, pp. 2542–2550, sep 2014.
- 636 [43] J. D. Thompson, B. Linard, O. Lecompte, and O. Poch, “A comprehensive benchmark  
637 study of multiple sequence alignment methods: Current challenges and future perspec-  
638 tives,” *PLoS ONE*, vol. 6, p. e18093, mar 2011.
- 639 [44] L.-T. Nguyen, H. A. Schmidt, A. von Haeseler, and B. Q. Minh, “IQ-TREE: A fast and  
640 effective stochastic algorithm for estimating maximum-likelihood phylogenies,” *Molecular  
641 Biology and Evolution*, vol. 32, pp. 268–274, jan 2015.
- 642 [45] M. N. Price, P. S. Dehal, and A. P. Arkin, “FastTree 2 – Approximately Maximum-  
643 Likelihood Trees for Large Alignments,” *PLoS ONE*, vol. 5, p. e9490, mar 2010.
- 644 [46] V. Lefort, R. Desper, and O. Gascuel, “FastME 2.0: A Comprehensive, Accurate, and Fast  
645 Distance-Based Phylogeny Inference Program,” *Molecular Biology and Evolution*, vol. 32,  
646 pp. 2798–2800, oct 2015.
- 647 [47] K. Howe, A. Bateman, and R. Durbin, “QuickTree: Building huge neighbour-joining trees  
648 of protein sequences,” *Bioinformatics*, vol. 18, pp. 1546–1547, nov 2002.
- 649 [48] M. List, P. Ebert, and F. Albrecht, “Ten Simple Rules for Developing Usable Software in  
650 Computational Biology,” *PLoS Computational Biology*, vol. 13, p. e1005265, jan 2017.
- 651 [49] G. Wilson, D. A. Aruliah, C. T. Brown, N. P. Chue Hong, M. Davis, R. T. Guy, S. H.  
652 Haddock, K. D. Huff, I. M. Mitchell, M. D. Plumbley, B. Waugh, E. P. White, and P. Wil-  
653 son, “Best Practices for Scientific Computing,” *PLoS Biology*, vol. 12, no. 1, p. e1001745,  
654 2014.

- 655 [50] M. Touchon, A. Perrin, J. A. M. De Sousa, B. Vangchhia, S. Burn, C. L. O'Brien, E. Dena-  
656 mur, D. Gordon, and E. P. Rocha, "Phylogenetic background and habitat drive the genetic  
657 diversification of *Escherichia coli*," *PLoS Genetics*, vol. 16, p. e1008866, jun 2020.
- 658 [51] K. P. Schliep, "phangorn: Phylogenetic analysis in R," *Bioinformatics*, vol. 27, pp. 592–593,  
659 feb 2011.
- 660 [52] J. Hedge and D. J. Wilson, "Bacterial phylogenetic reconstruction from whole genomes is  
661 robust to recombination but demographic inference is not," *mBio*, vol. 5, pp. e02158–14,  
662 nov 2014.
- 663 [53] M. Lapierre, C. Blin, A. Lambert, G. Achaz, and E. P. Rocha, "The Impact of Selection,  
664 Gene Conversion, and Biased Sampling on the Assessment of Microbial Demography,"  
665 *Molecular biology and evolution*, vol. 33, pp. 1711–1725, jul 2016.
